# Supplementary material for: A family of lanthanide compounds based on nitronyl nitroxide radicals: synthesis, structure, magnetic and fluorescence properties
Source: Royal Society of Chemistry journal article supplement (doi:10.1039/c7ra05764d), 2017-01-01
Supplement: c7ra05764d1.pdf [file c7ra05764d1.pdf]

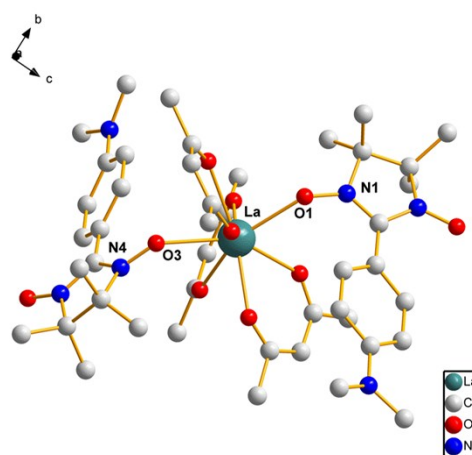

Fig. S1 The molecular structure of complex 1. Fluorine and hydrogen atoms are not shown for the sake of clarity.

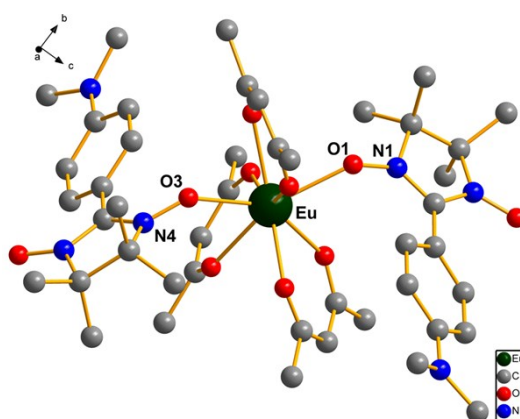

Fig. S2 The molecular structure of complex 2. Fluorine and hydrogen atoms are not shown for the sake of clarity.

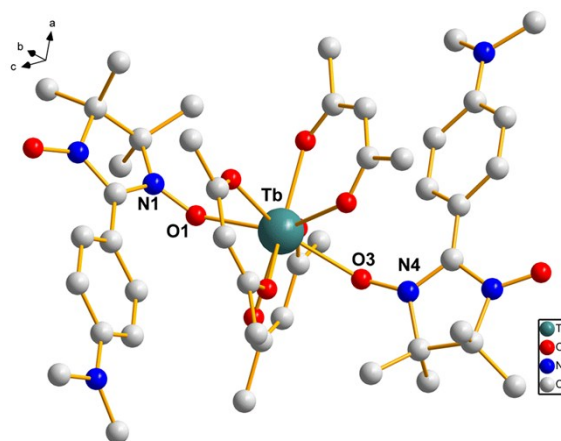

Fig. S3 The molecular structure of complex 4. Fluorine and hydrogen atoms are not shown for the sake of clarity.

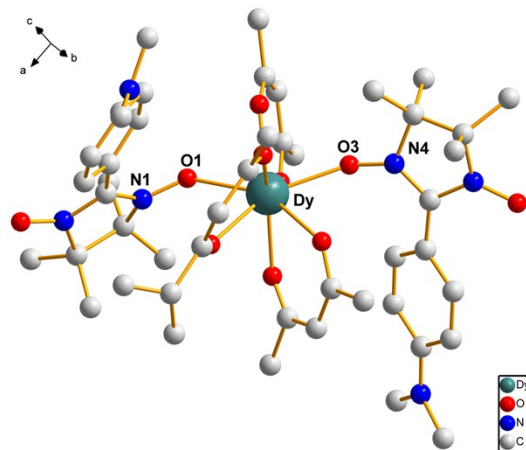

**Fig. S4** The molecular structure of complex 5. Fluorine and hydrogen atoms are not shown for the sake of clarity.

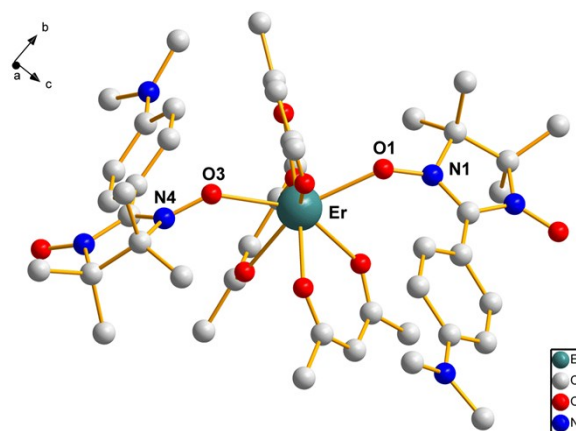

**Fig. S5** The molecular structure of complex 6. Fluorine and hydrogen atoms are not shown for the sake of clarity.

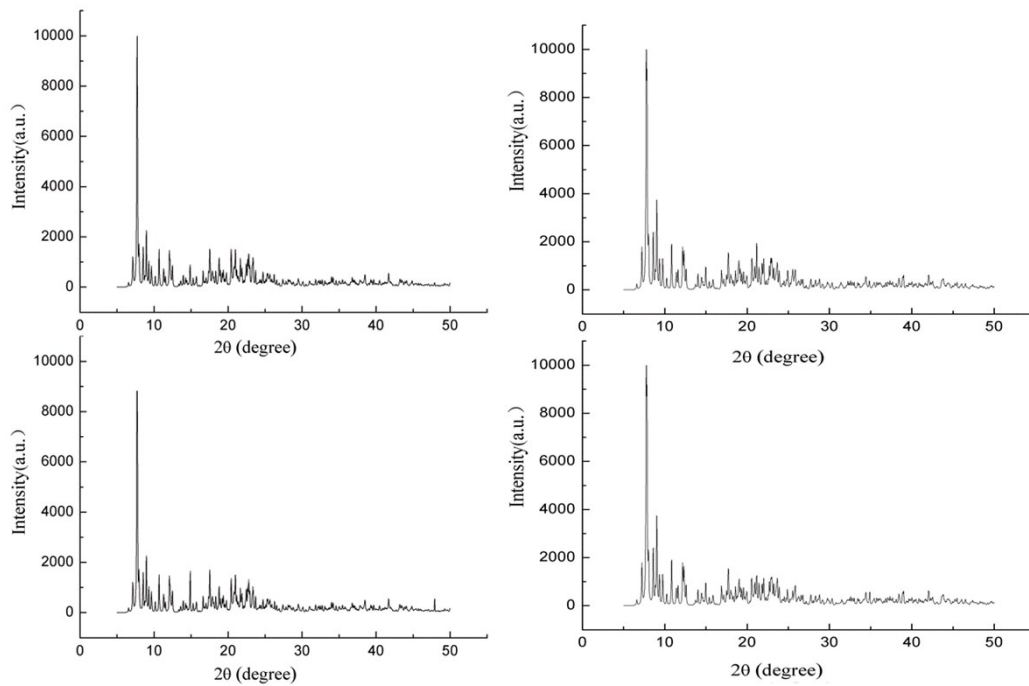

**Fig. S6** X-ray powder diffraction patterns of complexes 1(left), 3(right). Calculated pattern from single-crystal X-ray data (upper); experimental data (lower).

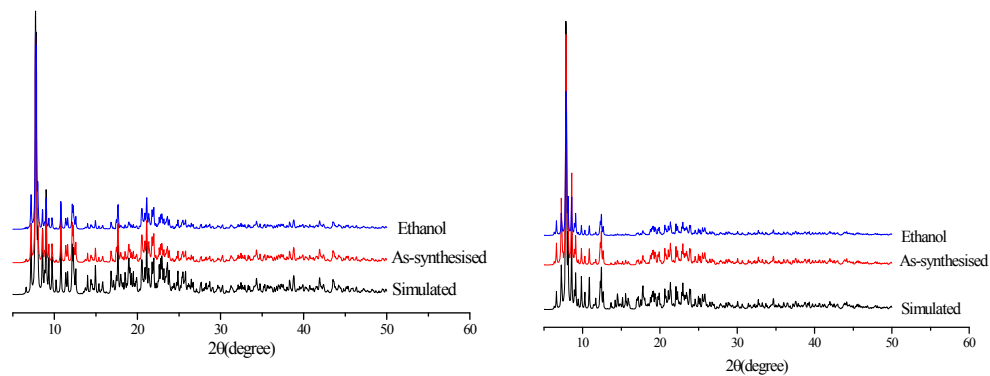

**Fig. S7** X-ray powder diffraction patterns of complexes **2**(left) and **4**(right), the samples after the luminescence experiment are labeled as “Ethanol”.

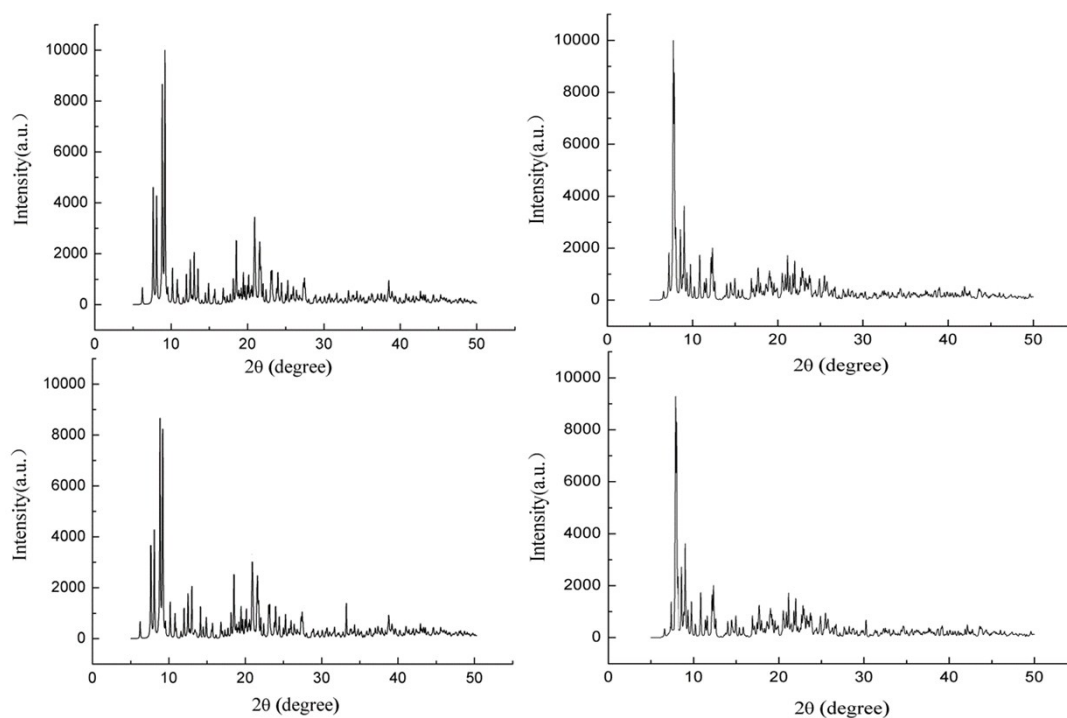

**Fig. S8** X-ray powder diffraction patterns of complexes **5**(left), **6**(right). Calculated pattern from single-crystal X-ray data (upper); experimental data (lower).

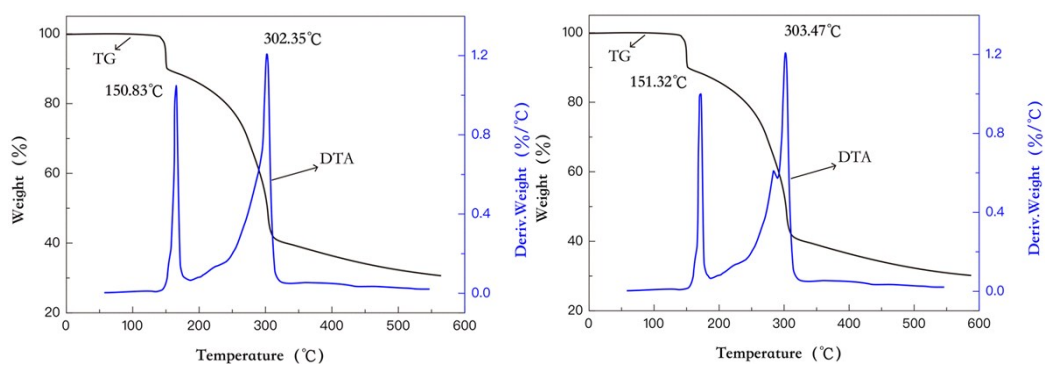

**Fig. S9** Thermal analysis curve of the complexes **1** and **2**.

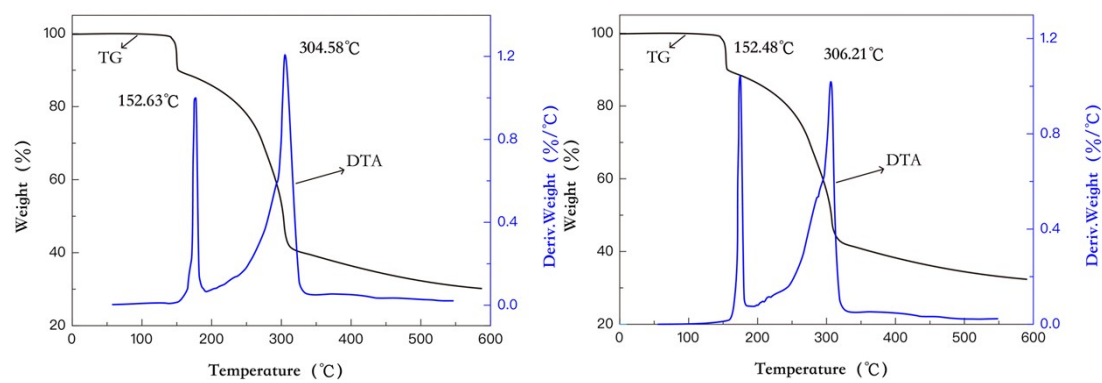

**Fig. S10** Thermal analysis curve of the complexes **3** and **4**.

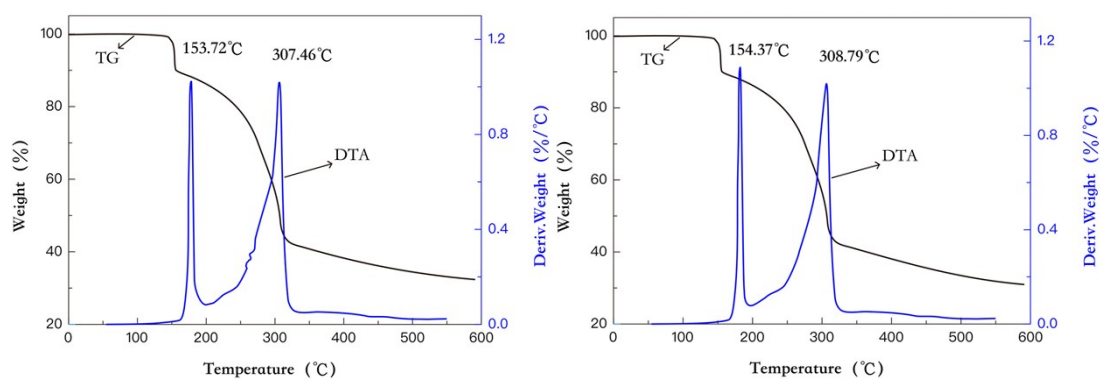

**Fig. S11** Thermal analysis curve of the complexes **5** and **6**.

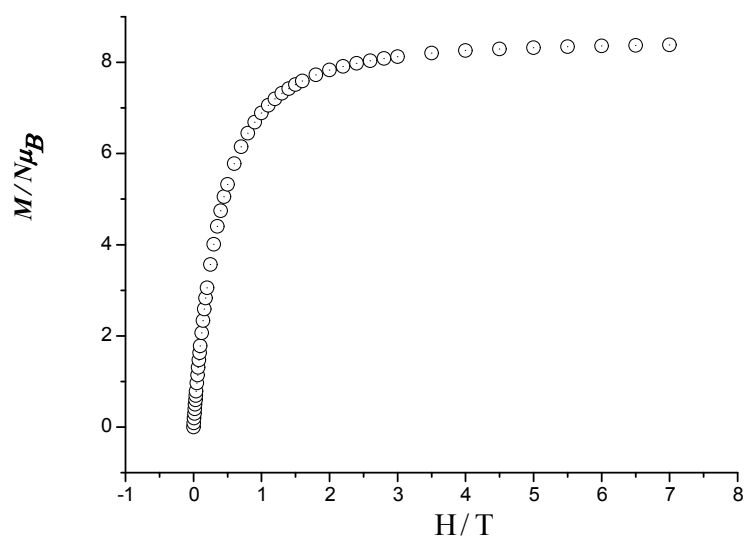

**Fig. S12** Field dependence of the magnetization performed at 2 K for complex **3**.

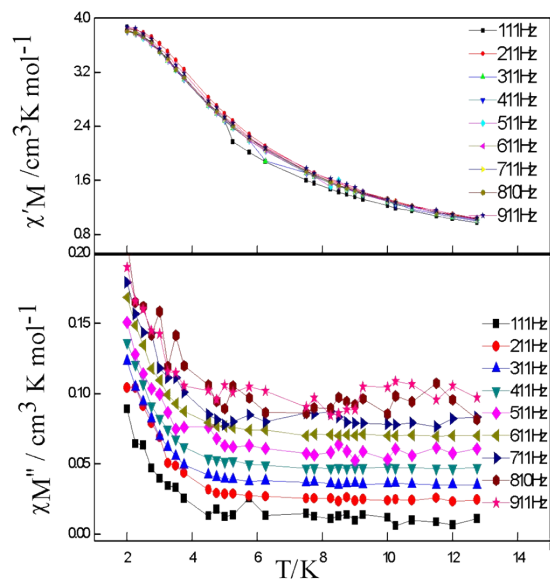

**Fig.S13** Frequency dependence of real (top) and imaginary (down) components of the ac magnetic susceptibility for **4** under zero applied dc field.

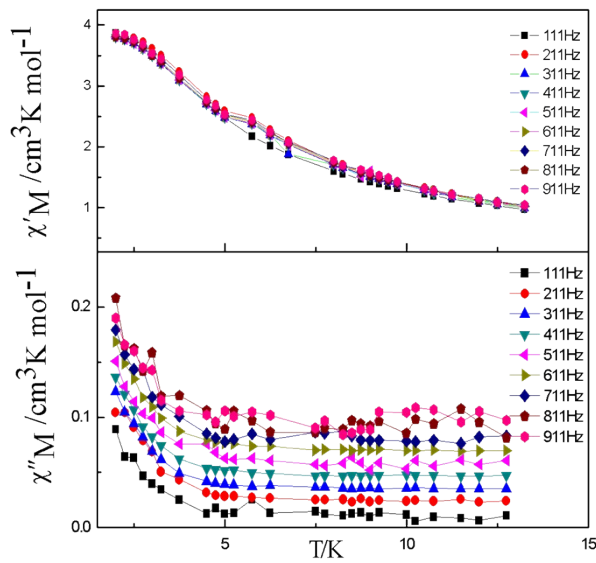

**Fig. S14** Frequency dependence of real (top) and imaginary (down) components of the ac magnetic susceptibility for **4** under 2000 Oe applied dc field.

**Table S1** The Important Bond Lengths(Å) and Angles(°) for **1-6**

| 1                |           |                  |           |
|------------------|-----------|------------------|-----------|
| Bond lengths     |           |                  |           |
| La(1)-O(1)       | 2.439(3)  | La(1)-O(3)       | 2.454(3)  |
| La(1)-O(6)       | 2.472(2)  | La(1)-O(9)       | 2.478(3)  |
| La(1)-O(8)       | 2.517(2)  | La(1)-O(10)      | 2.517(3)  |
| La(1)-O(7)       | 2.523(3)  | La(1)-O(5)       | 2.541(3)  |
| La(2)-O(11)#1    | 2.466(2)  | La(2)-O(11)      | 2.466(2)  |
| La(2)-O(14)      | 2.491(3)  | La(2)-O(14)#1    | 2.491(3)  |
| La(2)-O(15)      | 2.520(3)  | La(2)-O(13)      | 2.520(2)  |
| La(2)-O(15)#1    | 2.520(3)  | La(2)-O(13)#1    | 2.520(3)  |
| Bond angles      |           |                  |           |
| O(1)-La(1)-O(3)  | 141.44(9) | O(1)-La(1)-O(6)  | 90.76(9)  |
| O(3)-La(1)-O(6)  | 101.34(9) | O(1)-La(1)-O(9)  | 106.68(9) |
| O(3)-La(1)-O(9)  | 91.05(10) | O(6)-La(1)-O(9)  | 133.80(9) |
| O(1)-La(1)-O(8)  | 76.92(9)  | O(3)-La(1)-O(8)  | 73.67(9)  |
| O(6)-La(1)-O(8)  | 148.20(9) | O(9)-La(1)-O(8)  | 77.99(9)  |
| O(1)-La(1)-O(10) | 73.46(9)  | O(3)-La(1)-O(10) | 144.98(9) |
| O(6)-La(1)-O(10) | 75.25(9)  | O(9)-La(1)-O(10) | 69.77(10) |
| O(8)-La(1)-O(10) | 126.76(9) | O(1)-La(1)-O(7)  | 76.08(9)  |
| O(3)-La(1)-O(7)  | 70.58(9)  | O(6)-La(1)-O(7)  | 79.28(8)  |
| O(9)-La(1)-O(7)  | 145.82(9) | O(8)-La(1)-O(7)  | 69.39(8)  |
| O(10)-La(1)-O(7) | 139.58(9) | O(1)-La(1)-O(5)  | 144.97(9) |
| O(3)-La(1)-O(5)  | 72.68(9)  | O(6)-La(1)-O(5)  | 69.51(9)  |
| O(9)-La(1)-O(5)  | 72.33(9)  | O(8)-La(1)-O(5)  | 134.06(9) |
| O(10)-La(1)-O(5) | 73.63(9)  | O(7)-La(1)-O(5)  | 125.00(9) |
| 2                |           |                  |           |
| Bond lengths     |           |                  |           |
| Eu(1)-O(1)       | 2.344(2)  | Eu(1)-O(3)       | 2.356(2)  |
| Eu(1)-O(6)       | 2.367(2)  | Eu(1)-O(9)       | 2.369(2)  |
| Eu(1)-O(10)      | 2.409(3)  | Eu(1)-O(8)       | 2.413(2)  |
| Eu(1)-O(7)       | 2.417(2)  | Eu(1)-O(5)       | 2.437(2)  |
| Eu(2)-O(11)#1    | 2.378(2)  | Eu(2)-O(11)      | 2.378(2)  |
| Eu(2)-O(14)#1    | 2.382(2)  | Eu(2)-O(14)      | 2.382(2)  |
| Eu(2)-O(15)#1    | 2.415(2)  | Eu(2)-O(15)      | 2.415(2)  |
| Eu(2)-O(13)#1    | 2.416(2)  | Eu(2)-O(13)      | 2.416(2)  |
| Bond angles      |           |                  |           |
| O(1)-Eu(1)-O(3)  | 139.59(8) | O(1)-Eu(1)-O(6)  | 91.42(8)  |
| O(3)-Eu(1)-O(6)  | 101.43(8) | O(1)-Eu(1)-O(9)  | 105.42(9) |
| O(3)-Eu(1)-O(9)  | 90.52(9)  | O(6)-Eu(1)-O(9)  | 137.61(8) |
| O(1)-Eu(1)-O(10) | 73.76(8)  | O(3)-Eu(1)-O(10) | 146.51(8) |
| O(6)-Eu(1)-O(10) | 75.21(9)  | O(9)-Eu(1)-O(10) | 72.86(9)  |
| O(1)-Eu(1)-O(8)  | 75.25(8)  | O(3)-Eu(1)-O(8)  | 73.64(8)  |

---

|                     |            |                       |           |
|---------------------|------------|-----------------------|-----------|
| O(6)-Eu(1)-O(8)     | 147.72(8)  | O(9)-Eu(1)-O(8)       | 74.66(8)  |
| O(10)-Eu(1)-O(8)    | 126.33(8)  | O(1)-Eu(1)-O(7)       | 75.02(8)  |
| O(3)-Eu(1)-O(7)     | 71.37(8)   | O(6)-Eu(1)-O(7)       | 75.99(8)  |
| O(9)-Eu(1)-O(7)     | 145.55(8)  | O(10)-Eu(1)-O(7)      | 136.44(8) |
| O(8)-Eu(1)-O(7)     | 72.22(8)   | O(1)-Eu(1)-O(5)       | 146.83(8) |
| O(3)-Eu(1)-O(5)     | 73.09(8)   | O(6)-Eu(1)-O(5)       | 71.98(8)  |
| O(9)-Eu(1)-O(5)     | 73.05(8)   | O(10)-Eu(1)-O(5)      | 74.28(9)  |
| O(8)-Eu(1)-O(5)     | 132.73(8)  | O(7)-Eu(1)-O(5)       | 125.35(8) |
| O(11)#1-Eu(2)-O(11) | 146.48(12) | O(11)#1-Eu(2)-O(14)#1 | 91.99(8)  |
| O(11)-Eu(2)-O(14)#1 | 99.03(8)   | O(11)#1-Eu(2)-O(14)   | 99.03(8)  |

### 3

#### Bond lengths

|               |            |               |            |
|---------------|------------|---------------|------------|
| Gd(1)-O(1)    | 2.3329(19) | Gd(1)-O(3)    | 2.3411(19) |
| Gd(1)-O(6)    | 2.3482(19) | Gd(1)-O(9)    | 2.348(2)   |
| Gd(1)-O(10)   | 2.392(2)   | Gd(1)-O(8)    | 2.3942(19) |
| Gd(1)-O(7)    | 2.4004(19) | Gd(2)-O(11)   | 2.3621(19) |
| Gd(2)-O(11)#1 | 2.3622(19) | Gd(2)-O(14)   | 2.3640(19) |
| Gd(2)-O(14)#1 | 2.3641(19) | Gd(2)-O(13)#1 | 2.3990(19) |
| Gd(2)-O(13)   | 2.3991(19) | Gd(2)-O(15)   | 2.3991(19) |
| Gd(2)-O(15)#1 | 2.3992(19) | Gd(1)-O(3)    | 2.3411(19) |
| Gd(1)-O(1)    | 2.3329(19) |               |            |

#### Bond angles

|                  |           |                  |           |
|------------------|-----------|------------------|-----------|
| O(1)-Gd(1)-O(3)  | 139.42(7) | O(1)-Gd(1)-O(6)  | 91.61(7)  |
| O(3)-Gd(1)-O(6)  | 101.19(7) | O(1)-Gd(1)-O(9)  | 105.10(7) |
| O(3)-Gd(1)-O(9)  | 90.77(7)  | O(6)-Gd(1)-O(9)  | 137.97(7) |
| O(1)-Gd(1)-O(10) | 73.67(7)  | O(3)-Gd(1)-O(10) | 146.79(7) |
| O(6)-Gd(1)-O(10) | 75.32(7)  | O(9)-Gd(1)-O(10) | 73.04(7)  |
| O(1)-Gd(1)-O(8)  | 75.13(7)  | O(3)-Gd(1)-O(8)  | 73.63(7)  |
| O(6)-Gd(1)-O(8)  | 147.59(7) | O(9)-Gd(1)-O(8)  | 74.44(7)  |
| O(10)-Gd(1)-O(8) | 126.33(7) | O(1)-Gd(1)-O(7)  | 74.90(7)  |
| O(3)-Gd(1)-O(7)  | 71.43(7)  | O(6)-Gd(1)-O(7)  | 75.62(7)  |
| O(9)-Gd(1)-O(7)  | 145.63(7) | O(10)-Gd(1)-O(7) | 136.02(7) |
| O(8)-Gd(1)-O(7)  | 72.42(7)  | O(1)-Gd(1)-O(5)  | 146.96(7) |
| O(3)-Gd(1)-O(5)  | 73.18(7)  | O(6)-Gd(1)-O(5)  | 72.23(7)  |
| O(9)-Gd(1)-O(5)  | 73.11(7)  | O(10)-Gd(1)-O(5) | 74.40(7)  |
| O(8)-Gd(1)-O(5)  | 132.56(7) | O(7)-Gd(1)-O(5)  | 125.52(7) |

### 4

#### Bond lengths

|               |          |             |          |
|---------------|----------|-------------|----------|
| Tb(1)-O(1)    | 2.324(3) | Tb(1)-O(6)  | 2.330(3) |
| Tb(1)-O(3)    | 2.333(3) | Tb(1)-O(9)  | 2.340(3) |
| Tb(1)-O(8)    | 2.377(3) | Tb(1)-O(10) | 2.381(3) |
| Tb(1)-O(7)    | 2.390(3) | Tb(1)-O(5)  | 2.396(3) |
| Tb(2)-O(14)#1 | 2.351(3) | Tb(2)-O(14) | 2.351(3) |
| Tb(2)-O(11)#1 | 2.355(3) | Tb(2)-O(11) | 2.356(3) |

---

|                  |            |                  |            |
|------------------|------------|------------------|------------|
| Tb(2)-O(13)#1    | 2.377(3)   | Tb(2)-O(13)      | 2.377(3)   |
| Tb(2)-O(15)      | 2.384(3)   | Tb(2)-O(15)#1    | 2.385(3)   |
| O(1)-N(1)        | 1.309(4)   | O(2)-N(2)        | 1.294(5)   |
| O(3)-N(4)        | 1.314(4)   | O(4)-N(5)        | 1.273(4)   |
| O(11)-N(7)       | 1.314(4)   | O(12)-N(8)       | 1.272(4)   |
| Bond angles      |            |                  |            |
| O(1)-Tb(1)-O(6)  | 89.28(10)  | O(1)-Tb(1)-O(3)  | 138.73(9)  |
| O(6)-Tb(1)-O(3)  | 102.42(9)  | O(1)-Tb(1)-O(9)  | 107.10(10) |
| O(6)-Tb(1)-O(9)  | 140.33(10) | O(3)-Tb(1)-O(9)  | 88.84(11)  |
| O(1)-Tb(1)-O(8)  | 74.85(9)   | O(6)-Tb(1)-O(8)  | 145.81(9)  |
| O(3)-Tb(1)-O(8)  | 73.59(9)   | O(9)-Tb(1)-O(8)  | 73.84(10)  |
| O(1)-Tb(1)-O(10) | 74.61(9)   | O(6)-Tb(1)-O(10) | 76.81(10)  |
| O(3)-Tb(1)-O(10) | 146.44(10) | O(9)-Tb(1)-O(10) | 73.41(11)  |
| O(8)-Tb(1)-O(10) | 125.35(10) | O(1)-Tb(1)-O(7)  | 74.56(9)   |
| O(6)-Tb(1)-O(7)  | 73.91(9)   | O(3)-Tb(1)-O(7)  | 71.16(10)  |
| O(9)-Tb(1)-O(7)  | 144.71(10) | O(8)-Tb(1)-O(7)  | 72.74(9)   |
| O(10)-Tb(1)-O(7) | 137.25(10) | O(1)-Tb(1)-O(5)  | 146.57(10) |
| O(6)-Tb(1)-O(5)  | 72.46(10)  | O(3)-Tb(1)-O(5)  | 73.82(10)  |
| O(9)-Tb(1)-O(5)  | 74.58(10)  | O(8)-Tb(1)-O(5)  | 134.47(10) |
| O(10)-Tb(1)-O(5) | 74.07(10)  | O(7)-Tb(1)-O(5)  | 123.81(10) |

### 5

|                  |                  |                  |                  |
|------------------|------------------|------------------|------------------|
| Bond lengths     |                  |                  |                  |
| Dy(1)-O(3)       | Dy(1)-O(3)       | Dy(1)-O(3)       | Dy(1)-O(3)       |
| Dy(1)-O(5)       | Dy(1)-O(5)       | Dy(1)-O(5)       | Dy(1)-O(5)       |
| Dy(1)-O(8)       | Dy(1)-O(8)       | Dy(1)-O(8)       | Dy(1)-O(8)       |
| Dy(1)-O(7)       | Dy(1)-O(7)       | Dy(1)-O(7)       | Dy(1)-O(7)       |
| O(1)-N(1)        | O(1)-N(1)        | O(1)-N(1)        | O(1)-N(1)        |
| O(4)-N(5)        | O(4)-N(5)        | O(4)-N(5)        | O(4)-N(5)        |
| Bond angles      |                  |                  |                  |
| O(3)-Dy(1)-O(1)  | O(3)-Dy(1)-O(1)  | O(3)-Dy(1)-O(1)  | O(3)-Dy(1)-O(1)  |
| O(1)-Dy(1)-O(5)  | O(1)-Dy(1)-O(5)  | O(1)-Dy(1)-O(5)  | O(1)-Dy(1)-O(5)  |
| O(1)-Dy(1)-O(9)  | O(1)-Dy(1)-O(9)  | O(1)-Dy(1)-O(9)  | O(1)-Dy(1)-O(9)  |
| O(3)-Dy(1)-O(8)  | O(3)-Dy(1)-O(8)  | O(3)-Dy(1)-O(8)  | O(3)-Dy(1)-O(8)  |
| O(5)-Dy(1)-O(8)  | O(5)-Dy(1)-O(8)  | O(5)-Dy(1)-O(8)  | O(5)-Dy(1)-O(8)  |
| O(3)-Dy(1)-O(10) | O(3)-Dy(1)-O(10) | O(3)-Dy(1)-O(10) | O(3)-Dy(1)-O(10) |
| O(5)-Dy(1)-O(10) | O(5)-Dy(1)-O(10) | O(5)-Dy(1)-O(10) | O(5)-Dy(1)-O(10) |
| O(8)-Dy(1)-O(10) | O(8)-Dy(1)-O(10) | O(8)-Dy(1)-O(10) | O(8)-Dy(1)-O(10) |
| O(1)-Dy(1)-O(7)  | O(1)-Dy(1)-O(7)  | O(1)-Dy(1)-O(7)  | O(1)-Dy(1)-O(7)  |
| O(9)-Dy(1)-O(7)  | O(9)-Dy(1)-O(7)  | O(9)-Dy(1)-O(7)  | O(9)-Dy(1)-O(7)  |
| O(10)-Dy(1)-O(7) | O(10)-Dy(1)-O(7) | O(10)-Dy(1)-O(7) | O(10)-Dy(1)-O(7) |
| O(1)-Dy(1)-O(6)  | O(1)-Dy(1)-O(6)  | O(1)-Dy(1)-O(6)  | O(1)-Dy(1)-O(6)  |
| O(9)-Dy(1)-O(6)  | O(9)-Dy(1)-O(6)  | O(9)-Dy(1)-O(6)  | O(9)-Dy(1)-O(6)  |
| O(10)-Dy(1)-O(6) | O(10)-Dy(1)-O(6) | O(10)-Dy(1)-O(6) | O(10)-Dy(1)-O(6) |
| Bond angles      | Bond angles      | Bond angles      | Bond angles      |



| O(3)-Dy(1)-O(1)  | O(3)-Dy(1)-O(1) | O(3)-Dy(1)-O(1)  | O(3)-Dy(1)-O(1) |
|------------------|-----------------|------------------|-----------------|
| <b>6</b>         |                 |                  |                 |
| Bond lengths     |                 |                  |                 |
| Er(1)-O(1)       | Er(1)-O(1)      | Er(1)-O(1)       | Er(1)-O(1)      |
| Er(1)-O(6)       | Er(1)-O(6)      | Er(1)-O(6)       | Er(1)-O(6)      |
| Er(1)-O(10)      | Er(1)-O(10)     | Er(1)-O(10)      | Er(1)-O(10)     |
| Er(1)-O(7)       | Er(1)-O(7)      | Er(1)-O(7)       | Er(1)-O(7)      |
| Er(2)-O(14)      | Er(2)-O(14)     | Er(2)-O(14)      | Er(2)-O(14)     |
| Er(2)-O(11)#1    | Er(2)-O(11)#1   | Er(2)-O(11)#1    | Er(2)-O(11)#1   |
| Er(2)-O(15)#1    | Er(2)-O(15)#1   | Er(2)-O(15)#1    | Er(2)-O(15)#1   |
| Er(2)-O(13)#1    | Er(2)-O(13)#1   | Er(2)-O(13)#1    | Er(2)-O(13)#1   |
| Bond angles      |                 |                  |                 |
| O(1)-Er(1)-O(3)  | 139(4)          | O(1)-Er(1)-O(6)  | 91(4)           |
| O(3)-Er(1)-O(6)  | 102(4)          | O(1)-Er(1)-O(9)  | 105(4)          |
| O(3)-Er(1)-O(9)  | 90(4)           | O(6)-Er(1)-O(9)  | 140(4)          |
| O(1)-Er(1)-O(10) | 74(4)           | O(3)-Er(1)-O(10) | 147(4)          |
| O(6)-Er(1)-O(10) | 75(4)           | O(9)-Er(1)-O(10) | 74(4)           |
| O(1)-Er(1)-O(8)  | 75(4)           | O(3)-Er(1)-O(8)  | 74(4)           |
| O(6)-Er(1)-O(8)  | 147(4)          | O(9)-Er(1)-O(8)  | 73(4)           |
| O(10)-Er(1)-O(8) | 126(4)          | O(1)-Er(1)-O(7)  | 75(4)           |
| O(3)-Er(1)-O(7)  | 72(4)           | O(6)-Er(1)-O(7)  | 74(4)           |
| O(9)-Er(1)-O(7)  | 146(4)          | O(10)-Er(1)-O(7) | 135(4)          |
| O(8)-Er(1)-O(7)  | 74(4)           | O(1)-Er(1)-O(5)  | 147(4)          |
| O(3)-Er(1)-O(5)  | 73(4)           | O(6)-Er(1)-O(5)  | 74(4)           |
| O(9)-Er(1)-O(5)  | 73(4)           | O(10)-Er(1)-O(5) | 75(4)           |
| O(8)-Er(1)-O(5)  | 132(4)          | O(7)-Er(1)-O(5)  | 125(4)          |

**Table S2** The observed dihedral angle between planes along the  $i$ th edge( $\theta_i$ ), the dihedral angle for the ideal structure( $\delta_i$ ) and the estimated S values of complex **1**

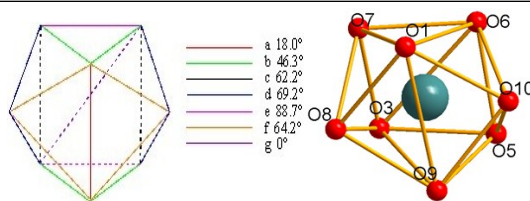

Distorted bicapped trigonal prismatic

| $\theta_i$ (°) | Edge  | $\delta_i$ (°) | $\delta_i - \theta_i$ (°) | $(\delta_i - \theta_i)^2$ |
|----------------|-------|----------------|---------------------------|---------------------------|
| 18             | O1-O9 | 16.963         | -1.037                    | 1.075369                  |
| 46.3           | O1-O7 | 58.849         | 12.549                    | 157.477401                |
| 46.3           | O1-O6 | 39.799         | -6.501                    | 42.263001                 |
| 46.3           | O9-O3 | 35.323         | -10.977                   | 120.494529                |
| 46.3           | O9-O5 | 59.008         | 12.708                    | 161.493264                |
| 62.2           | O7-O3 | 66.033         | 3.833                     | 14.691889                 |
| 62.2           | O6-O5 | 68.659         | 6.459                     | 41.718681                 |
| 69.2           | O8-O7 | 57.495         | -11.705                   | 137.007025                |

|      |        |        |         |            |
|------|--------|--------|---------|------------|
| 69.2 | O8-O3  | 56.951 | -12.249 | 150.038001 |
| 69.2 | O10-O6 | 56.347 | -12.853 | 165.199609 |
| 69.2 | O10-O5 | 49.828 | -19.372 | 375.274384 |
| 88.7 | O7-O6  | 71.307 | -17.393 | 302.516449 |
| 88.7 | O3-O5  | 73.687 | -15.013 | 225.390169 |
| 64.2 | O1-O8  | 65.613 | 1.413   | 1.996569   |
| 64.2 | O1-O10 | 76.773 | 12.573  | 158.080329 |
| 64.2 | O9-O8  | 75.731 | 11.531  | 132.963961 |
| 64.2 | O9-O10 | 70.055 | 5.855   | 34.281025  |
| 0    | O3-O6  | 19.848 | 19.848  | 393.943104 |

S=12.0552

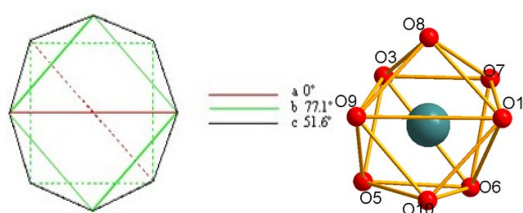

Square antiprism

| $\theta_i(^{\circ})$ | Edge   | $\delta_i(^{\circ})$ | $\delta_i - \theta_i(^{\circ})$ | $(\delta_i - \theta_i)^2$ |
|----------------------|--------|----------------------|---------------------------------|---------------------------|
| 0                    | O1-O9  | 16.963               | 16.963                          | 287.743369                |
| 0                    | O6-O3  | 19.848               | 19.848                          | 393.943104                |
| 51.6                 | O10-O6 | 56.347               | 4.747                           | 22.534009                 |
| 51.6                 | O6-O1  | 39.799               | -11.801                         | 139.263601                |
| 51.6                 | O1-O7  | 58.849               | 7.249                           | 52.548001                 |
| 51.6                 | O7-O8  | 57.495               | 5.895                           | 34.751025                 |
| 51.6                 | O8-O3  | 56.951               | 5.351                           | 28.633201                 |
| 51.6                 | O3-O9  | 35.323               | -16.277                         | 264.940729                |
| 51.6                 | O9-O5  | 59.008               | 7.408                           | 54.878464                 |
| 51.6                 | O5-O10 | 49.828               | -1.772                          | 3.139984                  |
| 77.1                 | O10-O1 | 76.773               | -0.327                          | 0.106929                  |
| 77.1                 | O1-O8  | 65.613               | -11.487                         | 131.951169                |
| 77.1                 | O8-O9  | 75.731               | -1.369                          | 1.874161                  |
| 77.1                 | O9-O10 | 70.055               | -7.045                          | 49.632025                 |
| 77.1                 | O6-O7  | 71.307               | -5.793                          | 33.558849                 |
| 77.1                 | O7-O3  | 66.033               | -11.067                         | 122.478489                |
| 77.1                 | O3-O5  | 73.687               | -3.413                          | 11.648569                 |
| 77.1                 | O5-O6  | 68.659               | -8.441                          | 71.250481                 |

S=9.7322

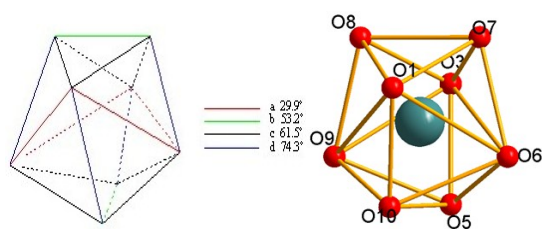

Distorted dodecahedron geometry

| $\theta_i(^{\circ})$ | Edge   | $\delta_i(^{\circ})$ | $\delta_i-\theta_i(^{\circ})$ | $(\delta_i-\theta_i)^2$ |
|----------------------|--------|----------------------|-------------------------------|-------------------------|
| 29.9                 | O1-O9  | 16.963               | -12.937                       | 167.365969              |
| 29.9                 | O1-O6  | 39.799               | 9.899                         | 97.990201               |
| 29.9                 | O3-O9  | 35.323               | 5.423                         | 29.408929               |
| 29.9                 | O3-O6  | 19.848               | -10.052                       | 101.042704              |
| 74.3                 | O8-O9  | 75.731               | 1.431                         | 2.047761                |
| 74.3                 | O1-O10 | 76.773               | 2.473                         | 6.115729                |
| 74.3                 | O7-O6  | 71.307               | -2.993                        | 8.958049                |
| 74.3                 | O5-O3  | 73.687               | -0.613                        | 0.375769                |
| 61.5                 | O10-O9 | 70.055               | 8.555                         | 73.188025               |
| 61.5                 | O10-O6 | 56.347               | -5.153                        | 26.553409               |
| 61.5                 | O5-O9  | 59.008               | -2.492                        | 6.210064                |
| 61.5                 | O5-O6  | 68.659               | 7.159                         | 51.251281               |
| 61.5                 | O1-O8  | 65.613               | 4.113                         | 16.916769               |
| 61.5                 | O1-O7  | 58.849               | -2.651                        | 7.027801                |
| 61.5                 | O3-O8  | 56.951               | -4.549                        | 20.693401               |
| 61.5                 | O3-O7  | 66.033               | 4.533                         | 20.548089               |
| 53.2                 | O8-O7  | 57.495               | 4.295                         | 18.447025               |
| 53.2                 | O10-O5 | 49.828               | -3.372                        | 11.370384               |

$S=6.0805$

**Table S3** The observed dihedral angle between planes along the  $i$ th edge( $\theta_i$ ), the dihedral angle for the ideal structure( $\delta_i$ ) and the estimated S values of complex **2**

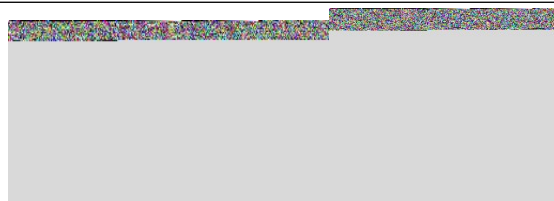

Distorted bicapped trigonal prismatic

| $\theta_i(^{\circ})$ | Edge   | $\delta_i(^{\circ})$ | $\delta_i-\theta_i(^{\circ})$ | $(\delta_i-\theta_i)^2$ |
|----------------------|--------|----------------------|-------------------------------|-------------------------|
| 18                   | O1-O9  | 17.911               | 0.089                         | 0.007921                |
| 46.3                 | O1-O6  | 37.008               | 9.292                         | 86.341264               |
| 46.3                 | O1-O7  | 59.261               | -12.961                       | 167.987521              |
| 46.3                 | O9-O3  | 34.525               | 11.775                        | 138.650625              |
| 46.3                 | O9-O5  | 59.91                | -13.61                        | 185.2321                |
| 62.2                 | O7-O3  | 66.142               | -3.942                        | 15.539364               |
| 62.2                 | O6-O5  | 67.505               | -5.305                        | 28.143025               |
| 69.2                 | O8-O7  | 54.677               | 14.523                        | 210.917529              |
| 69.2                 | O8-O3  | 57.522               | 11.678                        | 136.375684              |
| 69.2                 | O10-O6 | 57.968               | 11.232                        | 126.157824              |
| 69.2                 | O10-O5 | 52.049               | 17.151                        | 294.156801              |
| 88.7                 | O7-O6  | 73.267               | 15.433                        | 238.177489              |
| 88.7                 | O3-O5  | 73.903               | 14.797                        | 218.951209              |
| 64.2                 | O1-O8  | 66.175               | -1.975                        | 3.900625                |

|      |        |        |         |            |
|------|--------|--------|---------|------------|
| 64.2 | O1-O10 | 76.485 | -12.285 | 150.921225 |
| 64.2 | O9-O8  | 76.089 | -11.889 | 141.348321 |
| 64.2 | O9-O10 | 67.7   | -3.5    | 12.25      |
| 0    | O3-O6  | 20.087 | -20.087 | 403.487569 |

S=12.6513

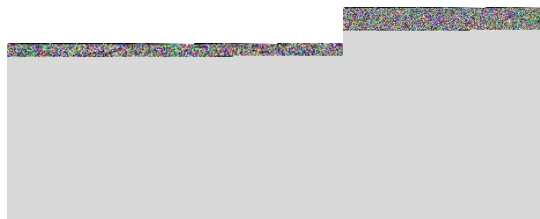

Square antiprism

| $\theta_i(^{\circ})$ | Edge   | $\delta_i(^{\circ})$ | $\delta_i - \theta_i(^{\circ})$ | $(\delta_i - \theta_i)^2$ |
|----------------------|--------|----------------------|---------------------------------|---------------------------|
| 0                    | O9-O1  | 17.911               | -17.911                         | 320.803921                |
| 0                    | O3-O6  | 20.087               | -20.087                         | 403.487569                |
| 77.1                 | O3-O7  | 66.142               | 10.958                          | 120.077764                |
| 77.1                 | O3-O5  | 73.903               | 3.197                           | 10.220809                 |
| 77.1                 | O6-O7  | 73.267               | 3.833                           | 14.691889                 |
| 77.1                 | O6-O5  | 67.505               | 9.595                           | 92.064025                 |
| 77.1                 | O8-O9  | 76.089               | 1.011                           | 1.022121                  |
| 77.1                 | O8-O1  | 66.175               | 10.925                          | 119.355625                |
| 77.1                 | O10-O9 | 67.7                 | 9.4                             | 88.36                     |
| 77.1                 | O10-O1 | 76.485               | 0.615                           | 0.378225                  |
| 51.5                 | O8-O3  | 57.522               | -5.922                          | 35.070084                 |
| 51.6                 | O8-O7  | 54.677               | -3.077                          | 9.467929                  |
| 51.6                 | O9-O3  | 34.525               | 17.075                          | 291.555625                |
| 51.6                 | O9-O5  | 59.91                | -8.31                           | 69.0561                   |
| 51.6                 | O1-O7  | 59.261               | -7.661                          | 58.690921                 |
| 51.6                 | O1-O6  | 37.008               | 14.592                          | 212.926464                |
| 51.6                 | O10-O6 | 57.968               | -6.368                          | 40.551424                 |
| 51.6                 | O10-O5 | 52.049               | -0.449                          | 0.201601                  |

S=10.24101

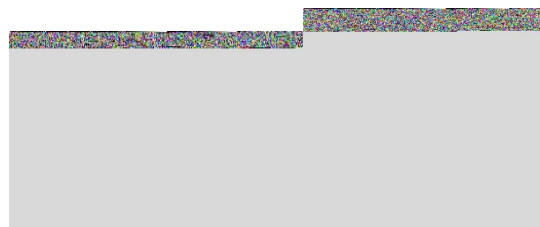

Distorted dodecahedron geometry

| $\theta_i(^{\circ})$ | Edge  | $\delta_i(^{\circ})$ | $\delta_i - \theta_i(^{\circ})$ | $(\delta_i - \theta_i)^2$ |
|----------------------|-------|----------------------|---------------------------------|---------------------------|
| 29.9                 | O1-O9 | 17.911               | 11.989                          | 143.736121                |
| 29.9                 | O1-O6 | 37.008               | -7.108                          | 50.523664                 |
| 29.9                 | O3-O9 | 34.525               | -4.625                          | 21.390625                 |
| 29.9                 | O3-O6 | 20.087               | 9.813                           | 96.294969                 |

|      |        |        |        |           |
|------|--------|--------|--------|-----------|
| 53.2 | O8-O7  | 54.677 | -1.477 | 2.181529  |
| 53.2 | O10-O5 | 52.094 | 1.106  | 1.223236  |
| 61.5 | O3-O8  | 57.522 | 3.978  | 15.824484 |
| 61.5 | O3-O7  | 66.142 | -4.642 | 21.548164 |
| 61.5 | O5-O6  | 67.505 | -6.005 | 36.060025 |
| 61.5 | O5-O9  | 59.91  | 1.59   | 2.5281    |
| 61.5 | O1-O8  | 66.175 | -4.675 | 21.855625 |
| 61.5 | O1-O7  | 59.261 | 2.239  | 5.013121  |
| 61.5 | O10-O9 | 67.4   | -5.9   | 34.81     |
| 61.5 | O10-O6 | 57.968 | 3.532  | 12.475024 |
| 74.3 | O8-O9  | 76.089 | -1.789 | 3.200521  |
| 74.3 | O7-O6  | 73.267 | 1.033  | 1.067089  |
| 74.3 | O5-O3  | 73.903 | 0.397  | 0.157609  |
| 74.3 | O1-O10 | 76.485 | -2.185 | 4.774225  |

$S=5.154793$

**Table S4** The observed dihedral angle between planes along the  $i$ th edge( $\theta_i$ ), the dihedral angle for the ideal structure( $\delta_i$ ) and the estimated S values of complex **3**

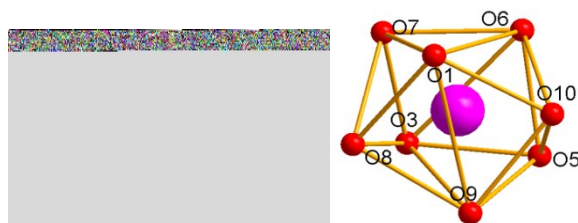

Distorted bicapped trigonal prismatic

| $\theta_i(^{\circ})$ | Edge   | $\delta_i(^{\circ})$ | $\delta_i - \theta_i(^{\circ})$ | $(\delta_i - \theta_i)^2$ |
|----------------------|--------|----------------------|---------------------------------|---------------------------|
| 18                   | O1-O9  | 18.239               | 0.239                           | 0.057121                  |
| 46.3                 | O1-O6  | 36.604               | -9.696                          | 94.012416                 |
| 46.3                 | O1-O7  | 59.48                | 13.18                           | 173.7124                  |
| 46.3                 | O9-O5  | 60.011               | 13.711                          | 187.991521                |
| 46.3                 | O9-O3  | 34.291               | -12.009                         | 144.216081                |
| 62.2                 | O7-O3  | 66.08                | 3.88                            | 15.0544                   |
| 62.2                 | O6-O5  | 44.738               | -17.462                         | 304.921444                |
| 69.2                 | O8-O7  | 54.325               | -14.875                         | 221.265625                |
| 69.2                 | O8-O3  | 57.737               | -11.463                         | 131.400369                |
| 69.2                 | O10-O6 | 58.09                | -11.11                          | 123.4321                  |
| 69.2                 | O10-O5 | 52.227               | -16.973                         | 288.082729                |
| 88.7                 | O7-O6  | 73.316               | -15.384                         | 236.667456                |
| 88.7                 | O3-O5  | 73.893               | -14.807                         | 219.247249                |
| 64.2                 | O1-O10 | 76.574               | 12.374                          | 153.115876                |
| 64.2                 | O1-O8  | 66.108               | 1.908                           | 3.640464                  |
| 64.2                 | O9-O8  | 75.983               | 11.783                          | 138.839089                |
| 64.2                 | O9-O10 | 67.408               | 3.208                           | 10.291264                 |

0  
S=12.61813

O3-O6      20.493      20.493      419.963049

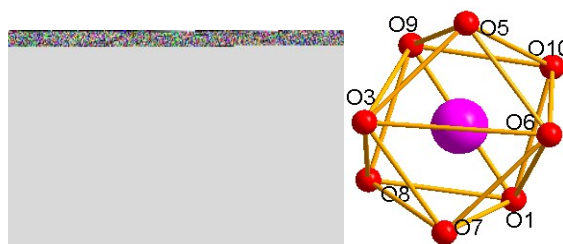

Square antiprism

| $\theta_i(^{\circ})$ | Edge   | $\delta_i(^{\circ})$ | $\delta_i - \theta_i(^{\circ})$ | $(\delta_i - \theta_i)^2$ |
|----------------------|--------|----------------------|---------------------------------|---------------------------|
| 0                    | O3-O6  | 20.493               | 20.493                          | 419.963049                |
| 0                    | O9-O1  | 18.239               | 18.239                          | 332.661121                |
| 77.1                 | O5-O3  | 73.893               | -3.207                          | 10.284849                 |
| 77.1                 | O5-O6  | 67.206               | -9.894                          | 97.891236                 |
| 77.1                 | O7-O3  | 66.08                | -11.02                          | 121.4404                  |
| 77.1                 | O7-O6  | 73.316               | -3.784                          | 14.318656                 |
| 77.1                 | O9-O10 | 67.408               | -9.692                          | 93.934864                 |
| 77.1                 | O9-O8  | 75.983               | -1.117                          | 1.247689                  |
| 77.1                 | O1-O10 | 76.574               | -0.526                          | 0.276676                  |
| 77.1                 | O1-O8  | 66.108               | -10.992                         | 120.824064                |
| 51.5                 | O5-O9  | 60.011               | 8.411                           | 70.744921                 |
| 51.6                 | O5-O10 | 52.227               | 0.627                           | 0.393129                  |
| 51.6                 | O3-O9  | 34.291               | -17.309                         | 299.601481                |
| 51.6                 | O3-O8  | 57.737               | 6.137                           | 37.662769                 |
| 51.6                 | O6-O1  | 36.604               | -14.996                         | 224.880016                |
| 51.6                 | O6-O10 | 58.09                | 6.49                            | 42.1201                   |
| 51.6                 | O7-O1  | 59.48                | 7.88                            | 62.0944                   |
| 51.6                 | O7-O8  | 54.325               | 2.725                           | 7.425625                  |

S=10.42903

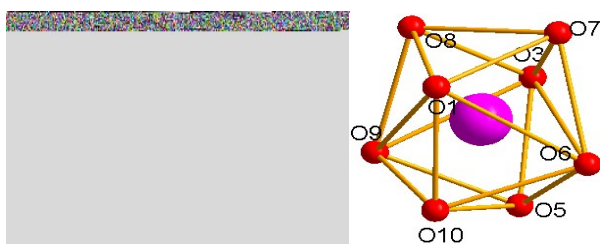

Distorted dodecahedron geometry

| $\theta_i(^{\circ})$ | Edge   | $\delta_i(^{\circ})$ | $\delta_i - \theta_i(^{\circ})$ | $(\delta_i - \theta_i)^2$ |
|----------------------|--------|----------------------|---------------------------------|---------------------------|
| 29.9                 | O1-O9  | 18.239               | -11.661                         | 135.978921                |
| 29.9                 | O1-O6  | 36.604               | 6.704                           | 44.943616                 |
| 29.9                 | O3-O9  | 34.291               | 4.391                           | 19.280881                 |
| 29.9                 | O3-O6  | 20.493               | -9.407                          | 88.491649                 |
| 53.2                 | O8-O7  | 54.325               | 1.125                           | 1.265625                  |
| 53.2                 | O10-O5 | 52.227               | -0.973                          | 0.946729                  |
| 61.5                 | O1-O8  | 66.108               | 4.608                           | 21.233664                 |

|      |        |        |        |           |
|------|--------|--------|--------|-----------|
| 61.5 | O1-O7  | 59.48  | -2.02  | 4.0804    |
| 61.5 | O3-O8  | 57.737 | -3.763 | 14.160169 |
| 61.5 | O3-O7  | 66.08  | 4.58   | 20.9764   |
| 61.5 | O5-O9  | 60.011 | -1.489 | 2.217121  |
| 61.5 | O5-O6  | 67.206 | 5.706  | 32.558436 |
| 61.5 | O10-O9 | 67.408 | 5.908  | 34.904464 |
| 61.5 | O10-O6 | 58.09  | -3.41  | 11.6281   |
| 74.3 | O8-O9  | 75.983 | 1.683  | 2.832489  |
| 74.3 | O7-O6  | 73.316 | -0.984 | 0.968256  |
| 74.3 | O1-O10 | 76.574 | 2.274  | 5.171076  |
| 74.3 | O3-O5  | 73.893 | -0.407 | 0.165649  |

S=4.954255

**Table S5** The observed dihedral angle between planes along the  $i$ th edge( $\theta_i$ ), the dihedral angle for the ideal structure( $\delta_i$ ) and the estimated S values of complex **4**

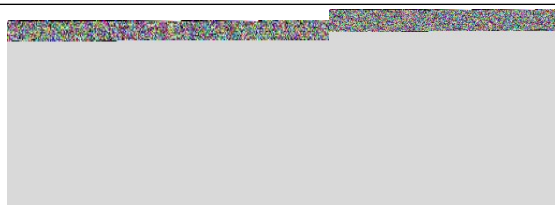

Distorted bicapped trigonal prismatic

| $\theta_i(^{\circ})$ | Edge   | $\delta_i(^{\circ})$ | $\delta_i-\theta_i(^{\circ})$ | $(\delta_i-\theta_i)^2$ |
|----------------------|--------|----------------------|-------------------------------|-------------------------|
| 18                   | O1-O9  | 15.818               | -2.182                        | 4.761124                |
| 46.3                 | O1-O6  | 38.983               | -7.317                        | 53.538489               |
| 46.3                 | O1-O7  | 58.266               | 11.966                        | 143.185156              |
| 46.3                 | O9-O3  | 37.425               | -8.875                        | 78.765625               |
| 46.3                 | O9-O5  | 31.002               | -15.298                       | 234.028804              |
| 62.2                 | O7-O3  | 67.029               | 4.829                         | 23.319241               |
| 62.2                 | O6-O5  | 68.131               | 5.931                         | 35.176761               |
| 69.2                 | O8-O7  | 53.566               | -15.634                       | 244.421956              |
| 69.2                 | O8-O3  | 56.535               | -12.665                       | 160.402225              |
| 69.2                 | O10-O6 | 56.178               | -13.022                       | 169.572484              |
| 69.2                 | O10-O5 | 53.92                | -15.28                        | 233.4784                |
| 88.7                 | O7-O6  | 73.653               | -15.047                       | 226.412209              |
| 88.7                 | O3-O5  | 73.631               | -15.069                       | 227.074761              |
| 64.2                 | O1-O8  | 67.256               | 3.056                         | 9.339136                |
| 64.2                 | O1-O10 | 76.707               | 12.507                        | 156.425049              |
| 64.2                 | O9-O8  | 76.315               | 12.115                        | 146.773225              |
| 64.2                 | O9-O10 | 69.164               | 4.964                         | 24.641296               |
| 0                    | O3-O6  | 17.973               | 17.973                        | 323.028729              |

S=11.77178

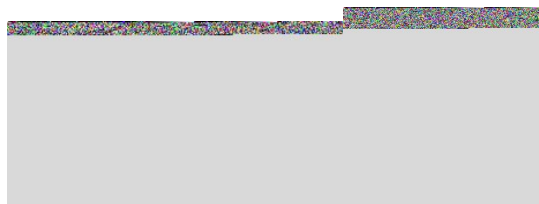

Square antiprism

| $\theta_i(^{\circ})$ | Edge   | $\delta_i(^{\circ})$ | $\delta_i - \theta_i(^{\circ})$ | $(\delta_i - \theta_i)^2$ |
|----------------------|--------|----------------------|---------------------------------|---------------------------|
| 0                    | O9-O1  | 15.818               | 15.818                          | 250.209124                |
| 0                    | O3-O6  | 17.973               | 17.973                          | 323.028729                |
| 77.1                 | O3-O7  | 67.029               | -10.071                         | 101.425041                |
| 77.1                 | O3-O5  | 73.631               | -3.469                          | 12.033961                 |
| 77.1                 | O6-O7  | 73.653               | -3.447                          | 11.881809                 |
| 77.1                 | O6-O5  | 68.131               | -8.969                          | 80.442961                 |
| 77.1                 | O8-O9  | 76.315               | -0.785                          | 0.616225                  |
| 77.1                 | O8-O1  | 67.256               | -9.844                          | 96.904336                 |
| 77.1                 | O10-O9 | 69.164               | -7.936                          | 62.980096                 |
| 77.1                 | O10-O1 | 76.707               | -0.393                          | 0.154449                  |
| 51.5                 | O8-O3  | 56.535               | 4.935                           | 24.354225                 |
| 51.6                 | O8-O7  | 53.566               | 1.966                           | 3.865156                  |
| 51.6                 | O9-O3  | 37.425               | -14.175                         | 200.930625                |
| 51.6                 | O9-O5  | 31.002               | -20.598                         | 424.277604                |
| 51.6                 | O1-O7  | 58.266               | 6.666                           | 44.435556                 |
| 51.6                 | O1-O6  | 38.983               | -12.617                         | 159.188689                |
| 51.6                 | O10-O6 | 56.178               | 4.578                           | 20.958084                 |
| 51.6                 | O10-O5 | 53.92                | 2.32                            | 5.3824                    |

S=10.06388

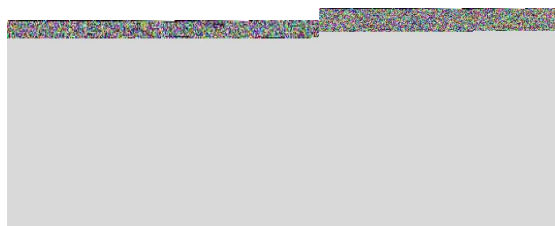

Distorted dodecahedron geometry

| $\theta_i(^{\circ})$ | Edge   | $\delta_i(^{\circ})$ | $\delta_i - \theta_i(^{\circ})$ | $(\delta_i - \theta_i)^2$ |
|----------------------|--------|----------------------|---------------------------------|---------------------------|
| 29.9                 | O1-O9  | 15.818               | -14.082                         | 198.302724                |
| 29.9                 | O1-O6  | 38.983               | 9.083                           | 82.500889                 |
| 29.9                 | O3-O9  | 37.425               | 7.525                           | 56.625625                 |
| 29.9                 | O3-O6  | 17.973               | -11.927                         | 142.253329                |
| 53.2                 | O8-O7  | 53.566               | 0.366                           | 0.133956                  |
| 53.2                 | O10-O5 | 53.92                | 0.72                            | 0.5184                    |
| 61.5                 | O3-O8  | 56.535               | -4.965                          | 24.651225                 |
| 61.5                 | O3-O7  | 67.029               | 5.529                           | 30.569841                 |
| 61.5                 | O5-O6  | 68.131               | 6.631                           | 43.970161                 |
| 61.5                 | O5-O9  | 31.002               | -30.498                         | 930.128004                |



|      |        |        |        |           |
|------|--------|--------|--------|-----------|
| 61.5 | O1-O8  | 67.256 | 5.756  | 33.131536 |
| 61.5 | O1-O7  | 58.266 | -3.234 | 10.458756 |
| 61.5 | O10-O9 | 69.164 | 7.664  | 58.736896 |
| 61.5 | O10-O6 | 56.178 | -5.322 | 28.323684 |
| 74.3 | O8-O9  | 76.315 | 2.015  | 4.060225  |
| 74.3 | O7-O6  | 73.653 | -0.647 | 0.418609  |
| 74.3 | O5-O3  | 73.631 | -0.669 | 0.447561  |
| 74.3 | O1-O10 | 76.707 | 2.407  | 5.793649  |

S=9.577245

**Table S6** The observed dihedral angle between planes along the  $i$ th edge( $\theta_i$ ), the dihedral angle for the ideal structure( $\delta_i$ ) and the estimated S values of complex **5**

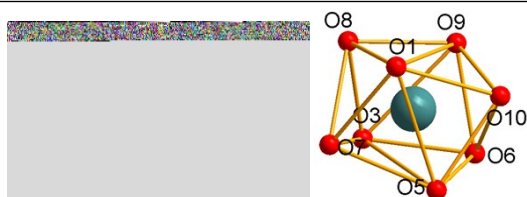

Distorted bicapped trigonal prismatic

| $\theta_i(^{\circ})$ | Edge   | $\delta_i(^{\circ})$ | $\delta_i-\theta_i(^{\circ})$ | $(\delta_i-\theta_i)^2$ |
|----------------------|--------|----------------------|-------------------------------|-------------------------|
| 18                   | O1-O5  | 32.933               | 14.933                        | 222.994489              |
| 46.3                 | O1-O8  | 67.187               | 20.887                        | 436.266769              |
| 46.3                 | O1-O9  | 19.086               | -27.214                       | 740.601796              |
| 46.3                 | O5-O3  | 20.476               | -25.824                       | 666.878976              |
| 46.3                 | O5-O6  | 66.185               | 19.885                        | 395.413225              |
| 62.2                 | O3-O8  | 57.922               | -4.278                        | 18.301284               |
| 62.2                 | O6-O9  | 62.204               | 0.004                         | 1.6E-05                 |
| 69.2                 | O10-O9 | 66.589               | -2.611                        | 6.817321                |
| 69.2                 | O10-O6 | 51.596               | -17.604                       | 309.900816              |
| 69.2                 | O7-O8  | 51.615               | -17.585                       | 309.232225              |
| 69.2                 | O7-O3  | 67.784               | -1.416                        | 2.005056                |
| 88.7                 | O8-O9  | 76.352               | -12.348                       | 152.473104              |
| 88.7                 | O3-O6  | 74.737               | -13.963                       | 194.965369              |
| 64.2                 | O1-O7  | 60.905               | -3.295                        | 10.857025               |
| 64.2                 | O1-O10 | 75.965               | 11.765                        | 138.415225              |
| 64.2                 | O5-O7  | 74.257               | 10.057                        | 101.143249              |
| 64.2                 | O5-O10 | 61.429               | -2.771                        | 7.678441                |
| 0                    | O3-O9  | 64.861               | 64.861                        | 4206.949321             |

S=20.97736

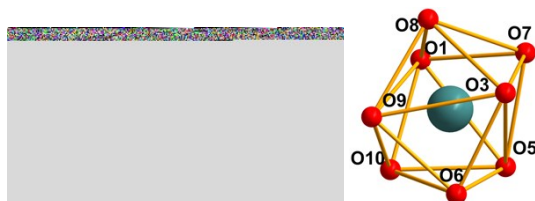

Square antiprism

| $\theta_i(^{\circ})$ | Edge   | $\delta_i(^{\circ})$ | $\delta_i-\theta_i(^{\circ})$ | $(\delta_i-\theta_i)^2$ |
|----------------------|--------|----------------------|-------------------------------|-------------------------|
| 0                    | O9-O3  | 31.794               | 31.794                        | 1010.85844              |
| 0                    | O1-O5  | 32.933               | 32.933                        | 1084.58249              |
| 77.1                 | O9-O8  | 76.352               | -0.748                        | 0.559504                |
| 77.1                 | O3-O8  | 57.922               | -19.178                       | 367.795684              |
| 77.1                 | O1-O7  | 60.905               | -16.195                       | 262.278025              |
| 77.1                 | O1-O10 | 75.965               | -1.135                        | 1.288225                |
| 77.1                 | O5-O7  | 74.257               | -2.843                        | 8.082649                |
| 77.1                 | O5-O10 | 61.429               | -15.671                       | 245.580241              |
| 77.1                 | O6-O9  | 62.204               | -14.896                       | 221.890816              |
| 77.1                 | O6-O3  | 74.737               | -2.363                        | 5.583769                |
| 51.5                 | O8-O1  | 67.187               | 15.587                        | 242.954569              |
| 51.6                 | O8-O7  | 51.615               | 0.015                         | 0.000225                |
| 51.6                 | O9-O1  | 19.086               | -32.514                       | 1057.1602               |
| 51.6                 | O9-O10 | 66.589               | 14.989                        | 224.670121              |
| 51.6                 | O3-O7  | 67.784               | 16.184                        | 261.921856              |
| 51.6                 | O3-O5  | 20.476               | -31.124                       | 968.703376              |
| 51.6                 | O6-O5  | 66.185               | 14.585                        | 212.722225              |
| 51.6                 | O6-O10 | 51.596               | -0.004                        | 1.6E-05                 |

S=18.5242

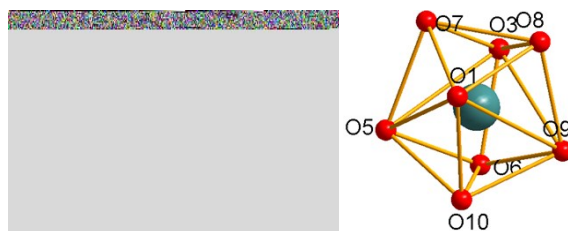

Distorted dodecahedron geometry

| $\theta_i(^{\circ})$ | Edge   | $\delta_i(^{\circ})$ | $\delta_i-\theta_i(^{\circ})$ | $(\delta_i-\theta_i)^2$ |
|----------------------|--------|----------------------|-------------------------------|-------------------------|
| 29.9                 | O3-O6  | 20.047               | -9.853                        | 97.081609               |
| 29.9                 | O1-O5  | 32.933               | 3.033                         | 9.199089                |
| 29.9                 | O1-O9  | 19.086               | -10.814                       | 116.942596              |
| 29.9                 | O3-O5  | 20.476               | -9.424                        | 88.811776               |
| 53.2                 | O3-O9  | 31.794               | 1.894                         | 3.587236                |
| 53.2                 | O7-O8  | 51.615               | -1.585                        | 2.512225                |
| 61.5                 | O10-O6 | 66.589               | 13.389                        | 179.265321              |
| 61.5                 | O3-O8  | 57.922               | -3.578                        | 12.802084               |
| 61.5                 | O3-O7  | 67.784               | 6.284                         | 39.488656               |
| 61.5                 | O1-O8  | 67.187               | 5.687                         | 32.341969               |
| 61.5                 | O1-O7  | 60.905               | -0.595                        | 0.354025                |
| 61.5                 | O6-O9  | 62.204               | 0.704                         | 0.495616                |
| 61.5                 | O6-O5  | 66.185               | 4.685                         | 21.949225               |
| 61.5                 | O5-O10 | 61.429               | -0.071                        | 0.005041                |
| 74.3                 | O1-O8  | 67.187               | 5.687                         | 32.341969               |
| 74.3                 | O8-O9  | 76.352               | 2.052                         | 4.210704                |

|      |        |        |       |          |
|------|--------|--------|-------|----------|
| 74.3 | O6-O3  | 74.737 | 0.437 | 0.190969 |
| 74.3 | O1-O10 | 75.965 | 1.665 | 2.772225 |

$S=5.513985$

**Table S7** The observed dihedral angle between planes along the  $i$ th edge( $\theta_i$ ), the dihedral angle for the ideal structure( $\delta_i$ ) and the estimated S values of complex **6**

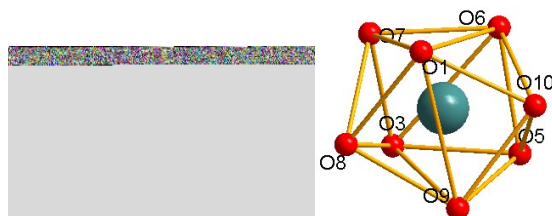

Distorted bicapped trigonal prismatic

| $\theta_i(^{\circ})$ | Edge   | $\delta_i(^{\circ})$ | $\delta_i - \theta_i(^{\circ})$ | $(\delta_i - \theta_i)^2$ |
|----------------------|--------|----------------------|---------------------------------|---------------------------|
| 18                   | O1-O9  | 18.331               | 0.331                           | 0.109561                  |
| 46.3                 | O1-O7  | 59.319               | 13.019                          | 169.494361                |
| 46.3                 | O1-O6  | 35.76                | -10.54                          | 111.0916                  |
| 46.3                 | O9-O3  | 34.186               | -12.114                         | 146.748996                |
| 46.3                 | O9-O5  | 60.344               | 14.044                          | 197.233936                |
| 62.2                 | O6-O5  | 66.667               | 4.467                           | 19.954089                 |
| 62.2                 | O7-O3  | 66.302               | 4.102                           | 16.826404                 |
| 69.2                 | O8-O7  | 53.233               | -15.967                         | 254.945089                |
| 69.2                 | O8-O3  | 57.958               | -11.242                         | 126.382564                |
| 69.2                 | O10-O6 | 46.656               | -22.544                         | 508.231936                |
| 69.2                 | O10-O5 | 53.444               | -15.756                         | 248.251536                |
| 88.7                 | O7-O6  | 74.158               | -14.542                         | 211.469764                |
| 88.7                 | O3-O5  | 19.013               | -69.687                         | 4856.277969               |
| 64.2                 | O1-O8  | 66.653               | 2.453                           | 6.017209                  |
| 64.2                 | O1-O10 | 76.406               | 12.206                          | 148.986436                |
| 64.2                 | O9-O8  | 76.21                | 12.01                           | 144.2401                  |
| 64.2                 | O9-O5  | 60.344               | -3.856                          | 14.868736                 |
| 0                    | O6-O3  | 20.047               | 20.047                          | 401.882209                |

$S=20.52507$

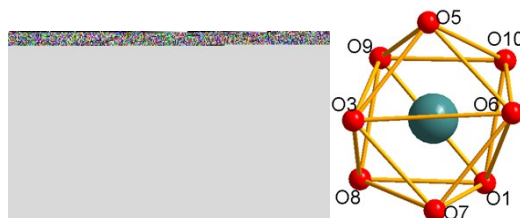

Square antiprism

| $\theta_i(^{\circ})$ | Edge  | $\delta_i(^{\circ})$ | $\delta_i - \theta_i(^{\circ})$ | $(\delta_i - \theta_i)^2$ |
|----------------------|-------|----------------------|---------------------------------|---------------------------|
| 0                    | O9-O1 | 18.331               | 18.331                          | 336.025561                |
| 0                    | O3-O6 | 20.047               | 20.047                          | 401.882209                |
| 77.1                 | O5-O3 | 74.277               | -2.823                          | 7.969329                  |

|      |        |        |         |            |
|------|--------|--------|---------|------------|
| 77.1 | O5-O6  | 66.667 | -10.433 | 108.847489 |
| 77.1 | O7-O3  | 66.302 | -10.798 | 116.596804 |
| 77.1 | O7-O6  | 74.158 | -2.942  | 8.655364   |
| 77.1 | O9-O10 | 66.441 | -10.659 | 113.614281 |
| 77.1 | O9-O8  | 76.21  | -0.89   | 0.7921     |
| 77.1 | O1-O10 | 76.406 | -0.694  | 0.481636   |
| 77.1 | O1-O8  | 66.653 | -10.447 | 109.139809 |
| 51.5 | O5-O10 | 46.154 | -5.446  | 29.658916  |
| 51.6 | O5-O9  | 60.344 | 8.744   | 76.457536  |
| 51.6 | O6-O10 | 58.545 | 6.945   | 48.233025  |
| 51.6 | O6-O1  | 35.76  | -15.84  | 250.9056   |
| 51.6 | O3-O9  | 34.186 | -17.414 | 303.247396 |
| 51.6 | O3-O8  | 57.958 | 6.358   | 40.424164  |
| 51.6 | O7-O1  | 59.319 | 7.719   | 59.582961  |
| 51.6 | O7-O8  | 53.233 | 1.633   | 2.666689   |

S=10.58086

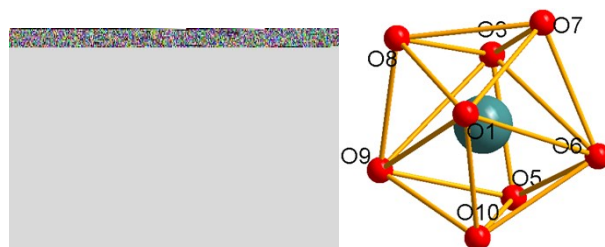

Distorted dodecahedron geometry

| $\theta_i(^{\circ})$ | Edge   | $\delta_i(^{\circ})$ | $\delta_i - \theta_i(^{\circ})$ | $(\delta_i - \theta_i)^2$ |
|----------------------|--------|----------------------|---------------------------------|---------------------------|
| 29.9                 | O3-O6  | 20.047               | -9.853                          | 97.081609                 |
| 29.9                 | O3-O9  | 34.186               | 4.286                           | 18.369796                 |
| 29.9                 | O1-O9  | 18.331               | -11.569                         | 133.841761                |
| 29.9                 | O1-O6  | 35.76                | 5.86                            | 34.3396                   |
| 53.2                 | O8-O7  | 53.233               | 0.033                           | 0.001089                  |
| 53.2                 | O10-O5 | 53.444               | 0.244                           | 0.059536                  |
| 61.5                 | O3-O8  | 57.958               | -3.542                          | 12.545764                 |
| 61.5                 | O3-O7  | 66.302               | 4.802                           | 23.059204                 |
| 61.5                 | O5-O6  | 66.667               | 5.167                           | 26.697889                 |
| 61.5                 | O5-O9  | 60.344               | -1.156                          | 1.336336                  |
| 61.5                 | O1-O7  | 59.319               | -2.181                          | 4.756761                  |
| 61.5                 | O1-O8  | 66.653               | 5.153                           | 26.553409                 |
| 61.5                 | O10-O9 | 66.441               | 4.941                           | 24.413481                 |
| 61.5                 | O10-O6 | 58.545               | -2.955                          | 8.732025                  |
| 74.3                 | O1-O10 | 76.406               | 2.106                           | 4.435236                  |
| 74.3                 | O8-O9  | 76.21                | 1.91                            | 3.6481                    |
| 74.3                 | O7-O6  | 74.158               | -0.142                          | 0.020164                  |
| 74.3                 | O5-O3  | 74.277               | -0.023                          | 0.000529                  |

S=4.82983
